# Supplementary material for: Integrative analyses of the RNA modification machinery reveal tissue- and cancer-specific signatures
Source: Genome Biol. 2020 May 7;21:97. doi: 10.1186/s13059-020-02009-z (PMC7204298; doi:10.1186/s13059-020-02009-z)
Supplement: Supplementary file 4 — Additional file 4: Table S4. Duplication events of Catalytic RNA Writer Proteins (RMWs) with tissue and target specificity information. [file 13059_2020_2009_MOESM4_ESM.xlsx]

## Sheet: Sheet1
Table S4. Duplication events of Catalytic RNA Writer Proteins (RMWs) with tissue and target specificity information
species	Taxon	Group	Ancestor	Tissue Specificity	Target Specificity	Paralog	Tissue Specificity2	Target Specificity2	Change
Ciliate	Eukaryota	Methylase	NOP2	-	rRNA(28sRNA-c4447 )	NSUN2	-	tRNA(Leu) (C34,48), tRNA(Gly) (C48,C49,C50)	Target
Ciliate	Eukaryota	Methylase	MRM1	-	mt-rRNA (Gm1145)	MRM3	-	mt-rRNA(Gm1370)	Target
Ciliate	Eukaryota	Methylase	MRM2	-	mt-rRNA	FTSJ1	-	tRNA(C32-G34)	Target
Ciliate	Eukaryota	Methylase	MRM2	-	mt-rRNA	FTSJ3	-	rRNA, HIV RNA	Target
Protozoa	Excavata/Amorphea	Methylase	DIMT1	-	rRNA(A1779-A1780)	TFB1M	-	mt-rRNA	Target
Sponge	Metazoa	Methylase	TRMT61A	-	tRNA,mRNA	TRMT61B	-	mt-tRNA (58),mt-mRNA,mt-rRNA	Target
Purple-sea-urchin	Deusterostomia	Methylase	TRMT10B	-	tRNA	TRMT10C	-	mt-tRNA,mt-mRNA	Target
Zebrafish	Vertebrata	Methylase	METTL2A	-	tRNA(Thr-Arg)	METTL8	-	mRNA	Target
Ciliate	Eukaryota	Pseudouridylase	PUSL1	-	NA	PUS1	-	tRNA\mttRNA(U27,U28,U30)	Target Unknown
Choanoflagellate	Holozoa	Pseudouridylase	PUS7	-	tRNA, tRFs, mRNA	PUS7L	-	NA	Target Unknown
Placozoa	Eumetazoa	Pseudouridylase	RPUSD2	-	NA	RPUSD1	-	NA	Target Unknown
Zebrafish	Vertebrata	Methylase	TRMT2A	-	tRNA(U54 in yeast homolog)	TRMT2B	-	tRNA(U54 in yeast homolog)	Target Unknown
Chimpanzee	Hominoidea	Methylase	METTL2A	-	tRNA(Thr-Arg)	METTL2B	-	tRNA(Thr-Arg)	Target Unknown In Humans
Ciliate	Eukaryota	Deaminase	ADAT2	-	tRNA(34)	ADAT3	Duodenum,Skin	tRNA(34)	Tissue
Choanoflagellate	Holozoa	Methylase	TFB1M	-	mt-rRNA	TFB2M	Adrenal, Liver	mt-rRNA	Tissue
Sponge	Metazoa	Methylase	TRMT10A	Testis	tRNA	TRMT10B	-	tRNA	Tissue
Zebrafish	Vertebrata	Methylase	NSUN4	Testis	mt-rRNA	NSUN3	-	mt-tRNA(C34)	Tissue,Target
Western-clawed-frog	Tetrapoda	Pseudouridylase	RPUSD4	Skeletal_Muscle	mt-rRNA(16s rRNA-U1397), mt-tRNA(U39)	RPUSD3	-	mt-mRNA	Tissue,Target
Green-anole	Amniota	Deaminase	AICDA	-	ssDNA	APOBEC1	Small Intestine, Duodenum	mRNA, HPV viralRNA	Tissue,Target
Macaque	Primates	Deaminase	APOBEC3H	-	ssDNA	APOBEC3A	Spleen,Lung,Vagina,Tonsil,Bone Marrow, Appendix	cellular RNA, ssDNA (HIV)	Tissue,Target
Macaque	Primates	Deaminase	APOBEC3H	-	ssDNA	APOBEC3G	Testis,Spleen,Ovary,Tonsil,Seminal Vesicle,Lymph Node	mRNA, ssDNA (HIV), HIV viral RNA	Tissue,Target
Ciliate	Eukaryota	Deaminase	ADAT2	-	tRNA(34)	ADAT1	Testis	tRNA(37)	Tissue,Target
Ciliate	Eukaryota	Methylase	NOP2	-	rRNA(28sRNA-c4447 )	NSUN5	Bone_Marrow	rRNA(28sRNA-c3782 )	Tissue,Target
Ciliate	Eukaryota	Methylase	MRM1	-	mt-rRNA (Gm1145)	TARBP1	Cerebellum	HIV RNA	Tissue,Target
Protozoa	Excavata/Amorphea	Methylase	FTSJ1	-	tRNA(C32-G34)	CMTR1	Testis	mRNA, snRNA	Tissue,Target
Amoeba	Amorphea	Methylase	NOP2	-	rRNA(28sRNA-c4447 )	NSUN6	Liver	tRNA	Tissue,Target
Amoeba	Amorphea	Methylase	NOP2	-	rRNA(28sRNA-c4447 )	NSUN4	Testis	mt-rRNA	Tissue,Target
Budding yeast	Opisthokonta	Methylase	TRMT5	Testis	tRNA(G37)	TRMT12	-	tRNA (imG-14)	Tissue,Target
Budding-yeast	Opisthokonta	Pseudouridylase	DKC1	-	rRNA	TRUB1	Adrenal	mRNA	Tissue,Target
Choanoflagellata	Holozoa	Methylase	METTL2A	-	tRNA(Thr-Arg)	METTL6	Testis	tRNA(Ser)	Tissue,Target
Choanoflagellate	Holozoa	Methylase	CMTR1	Testis	mRNA, snRNA	CMTR2	-	mRNA, snoRNA	Tissue,Target
Sponge	Metazoa	Methylase	NSUN5	Bone_Marrow	rRNA(28sRNA-c3782 )	NSUN7	Testis,Thyroid,Prostate,MinorSalivaryGland,Parathyroid	eRNA	Tissue,Target
Fruitfly	Bilateria	Methylase	MEPCE	Testis	snRNA	BCDIN3D	-	tRNA, miRNA	Tissue,Target
Fruit-fly	Bilateria	Pseudouridylase	TRUB1	Adrenal	mRNA	TRUB2	-	mt-mRNA	Tissue,Target
Zebrafish	Vertebrata	Methylase	THUMPD3	Testis	mt-tRNA (Needs experimental validation)	THUMPD2	-	tRNA (Needs experimental validation)	Tissue,Target Predicted
Budding-yeast	Opisthokonta	Methylase	TRMT11	-	tRNA(G10 in yeast homolog)	THUMPD3	Testis	mt-tRNA (Needs experimental validation)	Tissue,Target Predicted
Ciliate	Eukaryota	Pseudouridylase	PUSL1	-	NA	PUS3	Liver	tRNA(U38-U39)	Tissue,Target Unknown
Sponge	Metazoa	Deaminase	ADAT1	Testis	tRNA(37)	ADARB1	Lung,Cerebellum,Bladder,Esophagus,Artery	NA	Tissue,Target Unknown
Sponge	Metazoa	Deaminase	ADAT1	Testis	tRNA(37)	ADAR	-	NA	Tissue,Target Unknown
Sponge	Metazoa	Methylase	BUD23	Testis	rRNA	METTL27	Cervix,Parathyroid	NA	Tissue,Target Unknown
Placozoa	Eumetazoa	Methylase	TRMT9B	Cerebellum, Thyroid	tRNA	ALKBH8	-	tRNA	Tissue,Target Unknown
Mouse	Placentalia	Methylase	FBL	-	rRNA	FBLL1	Testis,Cerebellum,Brain,Pituitary	NA	Tissue,Target Unknown
Purple sea urchin	Deusterostomia	Methylase	TRMT1	-	tRNA, mt-tRNA	TRMT1L	Testis	tRNA (?)	Tissue,Target Unknown
Zebrafish	Vertebrata	Deaminase	ADARB1	Lung,Cerebellum,Bladder,Esophagus,Artery	NA	ADARB2	Brain,NerveTibial	NA	Tissue,Target Unknown
Zebrafish	Vertebrata	Deaminase	ADAR	-	NA	ADAD1	Testis	NA	Tissue,Target Unknown
Zebrafish	Vertebrata	Deaminase	ADAR	-	NA	ADAD2	Testis,Spleen	NA	Tissue,Target Unknown
